# Supplementary material
Source: publisher figshare collection journal article supplement (https://geolsoc.figshare.com/ndownloader/files/36235983)
Supplement: Supplementary file 1 [file 36235983]

## Sheet: Hoja1
N14-35
Analysis	Isotopic ratios
	207Pb/235U		207Pb/206Pb
Standard name	Ratio	± 2 se	Ratio	± 2 se
N14_35_1	20.79	1.25345	0.56	0.033
N14_35_2	27.0051	1.3127	0.442	0.017
N14_35_3	16.5017	0.816913	0.571	0.018
N14_35_4	10.5932	0.54986	0.664	0.02
N14_35_5	22.4215	1.15627	0.521	0.021
N14_35_6	16.5289	0.901578	0.603	0.024
N14_35_7	17.7305	0.911675	0.541	0.022
N14_35_8	9.31099	0.46815	0.681	0.025
N14_35_9	18.3486	1.17835	0.557	0.022
N14_35_10	17.0648	0.96099	0.59	0.028
N14_35_11	16.4745	0.868506	0.609	0.023
N14_35_12	9.97009	0.516894	0.663	0.027
N14_35_13	23.2288	1.13311	0.495	0.019
N14_35_14	16.0772	1.65424	0.582	0.037
N14_35_15	7.38007	0.435724	0.717	0.031
N14_35_16	8.18331	0.555822	0.704	0.025
N14_35_17	19.305	1.00625	0.523	0.02
N14_35_18	15.873	0.806248	0.599	0.021
N14_35_19	5.88928	0.343368	0.77	0.022
N14_35_20	23.31	1.14105	0.51	0.022
N14_35_21	10.01	0.511022	0.655	0.028
N14_35_22	11.534	0.638562	0.713	0.034
N14_35_23	20.0803	1.00805	0.531	0.019
N14_35_24	5.12821	0.368179	0.758	0.029
N14_35_25	25.1889	1.26896	0.473	0.021
N14_35_26	4.07166	0.21552	0.765	0.026
N14_35_27	18.3486	0.942682	0.537	0.022
N14_57_1	15.015	0.901803	0.588	0.018
N14_57_2	16.835	0.906937	0.554	0.024
N14_57_3	13.0378	0.76493	0.638	0.027
N14_57_4	22.7273	1.29132	0.49	0.019
N14_57_5	15.361	0.943839	0.619	0.027
N14_57_6	31.1527	1.64983	0.398	0.016
N14_57_7	29.3772	1.46713	0.43	0.014
N14_57_8	21.5983	1.16621	0.488	0.02
N14_57_9	22.5734	1.27389	0.504	0.023
N14_57_10	27.6091	1.37207	0.44	0.015
N14_57_11	27.3224	1.64233	0.465	0.028
N14_57_12	15.6494	1.12657	0.628	0.027
N14_57_13	18.018	0.973947	0.564	0.024
N14_57_14	22.5734	1.22294	0.485	0.022
N14_57_15	16.4745	0.787083	0.597	0.025
N14_57_16	4.01606	0.419348	0.766	0.022
N14_57_17	16.8067	2.73992	0.595	0.037
N14_57_18	26.2467	1.58445	0.448	0.021
N14_57_19	17.2712	1.16334	0.579	0.022
N14_57_20	16.7785	0.90086	0.583	0.027
N14_57_21	13.4409	0.686496	0.647	0.027
N14_57_22	26.9905	1.31128	0.449	0.017
N14_57_23	18.2482	1.06559	0.563	0.03
N14_57_24	14.881	0.77505	0.613	0.024
N14_57_25	19.6078	1.11496	0.53	0.018
N14_57_26	27.5482	1.44192	0.451	0.026
N14_57_27	10.8225	0.609059	0.698	0.028
N14_57_28	27.5482	1.5937	0.468	0.028
N14_57_29	18.4502	0.987187	0.593	0.027
N14_57_30	16.1551	0.913454	0.618	0.026
N15_139_1	10.2669	0.505968	0.681	0.021
N15_139_2	11.325	1.17996	0.672	0.025
N15_139_3	20.1613	1.01619	0.552	0.027
N15_139_4	16.9491	0.833094	0.574	0.015
N15_139_5	12.5786	0.680353	0.673	0.023
N15_139_6	11.0497	1.15992	0.671	0.02
N15_139_7	9.00901	0.49509	0.704	0.027
N15_139_8	11.6144	0.660982	0.662	0.026
N15_139_9	10.142	0.5143	0.656	0.019
N15_139_10	5.2356	0.520819	0.754	0.023
N15_139_11	11.4942	0.766284	0.685	0.019
N15_139_12	5.52792	0.281132	0.748	0.022
N15_139_13	18.6916	0.978251	0.558	0.014
N15_139_14	5.12821	1.02564	0.749	0.037
N15_139_15	7.91766	0.394942	0.706	0.026
N15_139_16	10.01	0.551102	0.682	0.019
N15_139_17	10.8342	0.563427	0.703	0.02
N15_139_18	12.1654	1.08039	0.628	0.019
N15_139_19	8.88889	0.750617	0.704	0.019
N15_139_20	10.9649	0.625192	0.666	0.022
N15_139_21	7.21501	0.338366	0.709	0.021
N15_139_22	9.7561	0.533016	0.686	0.018
N15_139_23	9.44287	0.454756	0.669	0.016
N15_139_24	9.9108	0.569699	0.69	0.021
N15_139_25	3.95257	0.249965	0.792	0.022
N15_139_26	10.6724	0.535326	0.669	0.022
N15_139_27	22.779	1.14155	0.511	0.015
N15_139_28	9.5511	0.46524	0.691	0.02
18JB14_1	15.8479	0.904157	0.568	0.02
18JB14_2	10.7066	0.584624	0.687	0.023
18JB14_3	18.3823	1.04752	0.564	0.018
18JB14_4	13.1579	1.14266	0.614	0.03
18JB14_5	8.59107	0.81187	0.678	0.024
18JB14_6	14.556	0.78395	0.612	0.027
18JB14_7	21.8818	1.34068	0.492	0.019
18JB14_8	6.73854	0.363264	0.719	0.022
18JB14_9	16.0514	0.824468	0.602	0.028
18JB14_10	6.92521	0.354893	0.721	0.026
18JB14_11	30.5904	1.40366	0.39	0.013
18JB14_12	32.5945	1.5936	0.346	0.012
18JB14_13	3.56252	0.190374	0.758	0.027
18JB14_14	8.14332	0.424408	0.707	0.023
18JB14_15	17.1527	1.20628	0.587	0.021
18JB14_16	7.12758	0.370858	0.743	0.023
18JB14_17	13.0719	0.751848	0.636	0.023
18JB14_18	5	0.375	0.777	0.032
18JB14_19	7.5643	0.526411	0.724	0.026
18JB14_20	15.7233	0.741664	0.579	0.024
18JB14_21	14.1044	0.71616	0.665	0.022
18JB14_22	5.54631	0.276854	0.769	0.028
18JB14_23	4.78469	0.343399	0.753	0.026
18JB14_24	25.5102	1.30154	0.456	0.017
18JB14_25	39.7931	1.90019	0.2501	0.0085
18JB14_26	9.93049	0.54238	0.686	0.023
18JB21_1	7.82473	0.446952	0.705	0.034
18JB21_2	9.97009	0.556655	0.669	0.036
18JB21_3	5.22739	0.254128	0.74	0.031
18JB21_4	11.3895	0.635634	0.707	0.039
18JB21_5	9.57854	0.568841	0.72	0.037
18JB21_6	9.23361	0.588291	0.692	0.042
18JB21_7	11.0132	0.618584	0.665	0.034
18JB21_8	3.02115	0.155165	0.764	0.026
18JB21_9	14.6843	0.819388	0.649	0.034
18JB21_10	8.48896	0.475613	0.721	0.037
18JB21_11	7.0373	0.401141	0.73	0.035
18JB21_12	8.53242	0.487775	0.71	0.037
18JB21_13	10.0908	0.570218	0.701	0.042
18JB21_14	4.67072	0.239971	0.75	0.022
18JB21_15	4.17886	0.209554	0.779	0.027
18JB21_16	5.47345	0.296591	0.752	0.035
18JB21_17	4.53515	0.226243	0.8	0.034
18JB21_18	8.95255	0.561037	0.679	0.031
18JB21_19	9.69932	0.545646	0.721	0.029
18JB21_20	2.0284	0.10286	0.785	0.025
18JB21_21	5.15464	0.292273	0.742	0.024
18JB21_22	5.53097	0.269207	0.784	0.035
18JB21_23	2.68097	0.136564	0.793	0.022
18JB21_24	9.67118	0.542484	0.676	0.036
18JB21_25	6.33312	0.324878	0.748	0.03
18JB21_26	10.5374	0.577392	0.697	0.033
18JB21_27	7.6864	0.413565	0.715	0.032
18JB26_1	29.0698	1.6056	0.307	0.015
18JB26_2	30.4229	1.48088	0.306	0.01
18JB26_3	28.86	1.33264	0.416	0.014
18JB26_4	31.4663	1.58421	0.278	0.011
18JB26_5	30.4878	1.76606	0.391	0.026
18JB26_6	11.0742	0.55187	0.666	0.021
18JB26_7	25.641	1.31492	0.372	0.015
18JB26_8	15.873	0.932225	0.528	0.025
18JB26_9	29.0023	1.42993	0.414	0.013
18JB26_10	29.3513	1.46455	0.338	0.014
18JB26_11	24.2131	1.23117	0.479	0.018
18JB26_12	5.75043	0.330675	0.712	0.031
18JB26_13	12.6422	0.671269	0.626	0.027
18JB26_14	20.79	1.12379	0.457	0.025
18JB26_15	19.8807	1.18573	0.446	0.016
18JB26_16	29.0782	1.35287	0.401	0.013
18JB26_17	30.6185	1.40624	0.291	0.012
18JB26_18	26.3158	1.45429	0.508	0.025
18JB26_19	24.2718	1.23716	0.426	0.016
18JB26_20	16.1031	0.985372	0.525	0.022
18JB26_21	22.3214	1.24561	0.526	0.019
18JB26_22	20.4082	1.08288	0.591	0.03
18JB26_23	28.2486	1.35657	0.409	0.016
18JB26_24	31.1429	1.55181	0.297	0.012
18JB26_1	25.3807	1.54603	0.35	0.018
18JB26_2	12.5313	0.64384	0.683	0.02
18JB26_3	22.2717	1.19047	0.501	0.019
18JB26_4	20	1.24	0.566	0.019
18JB26_5	26.178	1.43911	0.45	0.017
18JB26_6	23.3645	1.36475	0.477	0.022
18JB26_7	21.097	1.11271	0.529	0.024
18JB26_8	23.9808	1.26517	0.379	0.017
18JB26_9	21.0526	1.28532	0.464	0.021
18JB43_1	7.84314	0.49827	0.764	0.056
18JB43_2	8.881	0.520556	0.689	0.033
18JB43_3	3.64963	0.279717	0.8	0.033
18JB43_4	5.73066	0.311984	0.77	0.045
18JB43_5	5.39374	0.276378	0.745	0.041
18JB43_6	5.91366	0.311245	0.749	0.025
18JB43_7	13.2275	0.822345	0.655	0.035
18JB43_8	7.33676	0.446772	0.763	0.043
18JB43_9	5.68182	0.516529	0.695	0.055
18JB43_10	10.6044	0.584763	0.69	0.037
18JB43_11	5.31915	0.367814	0.702	0.042
18JB43_12	2.46305	0.139533	0.836	0.039
18JB43_13	8.74891	0.436297	0.623	0.019
18JB43_14	7.36377	0.422956	0.669	0.032
18JB43_15	5.97372	0.428223	0.727	0.048
18JB43_16	5.70776	0.390943	0.784	0.055
18JB43_17	14.5138	0.8426	0.579	0.027
18JB43_18	8.6881	0.75483	0.685	0.048
18JB43_19	6.90608	0.367243	0.735	0.034
18JB43_20	17.1821	1.35804	0.603	0.042
18JB43_21	5.02008	0.252012	0.772	0.034
18JB43_22	4.79616	0.299041	0.771	0.061
18JB43_23	3.15457	0.199027	0.783	0.045
18JB43_24	9.86193	0.544643	0.687	0.044
18JB43_25	8.29187	0.53629	0.735	0.047
18JB43_26	10.2145	0.719919	0.691	0.058
18JB43_27	5.91716	0.332621	0.738	0.045
18JB43_28	15.015	0.901803	0.564	0.032
18JB43_29	9.97009	0.536775	0.646	0.026
18JB43_30	9.09918	0.447093	0.643	0.027
18JB43_31	19.6078	1.19185	0.543	0.035
18JB43_32	31.4465	1.97777	0.364	0.033
18JB43_33	5.35906	0.287195	0.758	0.041
18JB43_34	10.395	0.659143	0.672	0.025
18JB43_1	4.16667	0.277778	0.767	0.03
18JB43_2	3.67512	0.202598	0.757	0.028
18JB43_3	5.50358	0.333183	0.737	0.036
18JB43_4	5.20021	0.297464	0.755	0.036
18JB43_5	10	0.55	0.63	0.022
18JB43_6	5.12821	0.34188	0.695	0.027
18JB43_7	7.04225	0.426503	0.703	0.039
18JB43_8	7.42942	0.458129	0.725	0.046
18JB43_9	6.54879	0.364536	0.699	0.034
18JB43_10	9.14913	0.518981	0.665	0.02
18JB43_11	4.21763	0.249038	0.775	0.032
18JB43_12	5.34759	0.343161	0.722	0.041
18JB43_13	4.71698	0.333749	0.715	0.038
18JB43_14	9.09918	0.637522	0.716	0.032
18JB43_15	5.82411	0.373123	0.748	0.071
18JB43_16	3.53357	0.237236	0.793	0.047
18JB43_17	5.38793	0.348358	0.727	0.03
18JB43_18	6.20732	0.36219	0.737	0.038
18JB43_19	4.63822	0.27967	0.713	0.023
18JB43_20	4.53515	0.267378	0.748	0.04
18JB43_21	4.11523	0.270961	0.799	0.061
18JB43_22	2.80899	0.19726	0.79	0.043
18JB43_23	2.68817	0.166204	0.804	0.041
18JB43_24	4.65116	0.367766	0.756	0.059
18JB43_25	5.66893	0.385642	0.732	0.043
18JB43_26	5.8651	0.343994	0.736	0.049
18JB43_27	17.0068	0.954463	0.524	0.018
18JB43_28	18.9394	1.21958	0.552	0.028
18JB43_29	11.2867	0.573251	0.562	0.015
18JB43_30	12.1951	0.728733	0.62	0.035
18JB43_31	7.54148	0.415179	0.694	0.032
18JB43_32	24.0964	1.74191	0.527	0.038
18JB43_33	14.0449	1.14411	0.602	0.046
18JB43_34	2.93255	0.189197	0.793	0.042
18JB43_35	4.08831	0.234	0.739	0.034
18JB43_36	17.3611	2.86338	0.557	0.048
18JB43_37	22.779	1.86799	0.518	0.054
18JB43_38	5.68182	0.41968	0.801	0.054
18JB43_39	7.42942	0.436051	0.716	0.028
18JB43_40	13.1926	0.783203	0.652	0.031
18JB43_41	8.58369	0.611542	0.687	0.05
18JB43_42	9.47867	0.610948	0.731	0.05
18JB43_43	6.8918	0.569963	0.753	0.056
18JB43_44	6.99301	0.405888	0.721	0.038
18JB43_45	8.17661	0.454628	0.681	0.033
18JB43_46	9.0009	0.526605	0.68	0.035
18JB43_47	7.8125	0.531006	0.732	0.047
18JB43_48	8.93655	0.50313	0.677	0.026
18JB43_49	12.6904	0.789121	0.586	0.034
18JB43_50	12.3457	0.701113	0.626	0.031
18JB43_51	7.0922	0.442634	0.69	0.038
18JB43_52	11.0742	0.686772	0.671	0.037
18JB43_53	4.9505	0.392118	0.752	0.057
18JB43_54	5.29381	0.364317	0.802	0.07
18JB43_55	3.47222	0.253183	0.755	0.055
18JB43_56	5.26039	0.276717	0.707	0.028
18JB43_57	4.50248	0.26354	0.704	0.031
18JB43_58	17.762	1.16731	0.547	0.024
18JB43_59	7.25689	0.431833	0.715	0.043
18JB43_60	2.03666	0.124439	0.81	0.039
18JB43_61	4.03877	0.244675	0.775	0.043
18JB43_62	7.86782	0.47665	0.71	0.039
18JB43_63	11.6144	0.741919	0.609	0.04
18JB43_64	3.43643	0.212562	0.758	0.031
18JB43_65	3.93701	0.2325	0.812	0.038
18JB43_66	3.59712	0.232907	0.874	0.049
18JB43_67	6.82594	0.386725	0.752	0.034
18JB66_1	42.0698	2.30083	0.235	0.016
18JB66_2	34.1297	1.98022	0.333	0.019
18JB66_3	36.63	2.28099	0.327	0.021
18JB66_4	44.6229	2.38945	0.199	0.016
18JB66_5	44.0529	2.52285	0.231	0.014
18JB66_6	40.1929	2.10011	0.261	0.017
18JB66_7	40.568	2.30406	0.267	0.016
18JB66_8	41.9815	1.93869	0.233	0.011
18JB66_9	26.0417	2.57704	0.444	0.033
18JB66_10	40.1445	2.25622	0.255	0.019
18JB66_11	35.3357	2.12264	0.322	0.018
18JB66_12	36.2319	2.1004	0.301	0.016
18JB66_13	23.31	2.17343	0.485	0.028
18JB66_14	36.2319	2.1004	0.311	0.024
18JB66_15	40.6009	2.30781	0.259	0.016
18JB66_16	33.0033	2.06951	0.382	0.031
18JB66_17	31.746	1.81406	0.404	0.024
18JB66_18	25.974	2.56367	0.448	0.034
18JB66_19	32.4675	1.79204	0.378	0.02
18JB66_20	42.7716	2.01235	0.236	0.015
18JB66_21	38.85	2.11306	0.271	0.016
18JB66_22	36.3636	2.1157	0.325	0.024
18JB66_23	35.8423	2.31241	0.322	0.023
18JB66_24	40.3063	1.94952	0.259	0.02
18JB66_25	39.7298	2.052	0.292	0.015
18JB66_26	28.9017	1.75415	0.416	0.024
18JB66_27	30.4878	2.04491	0.41	0.026
15JB79_1	3.31126	0.142538	0.837	0.039
15JB79_2	2.25225	0.116671	0.755	0.038
15JB79_3	4.2517	0.198847	0.78	0.043
15JB79_4	3.1348	0.176885	0.762	0.049
15JB79_5	2.34742	0.0771452	0.804	0.03
15JB79_6	5.57414	0.273425	0.742	0.05
15JB79_7	2.89017	0.158709	0.824	0.04
15JB79_8	7.47943	0.402782	0.754	0.037
15JB79_9	4.98505	0.238566	0.791	0.035
15JB79_10	4.20345	0.194359	0.789	0.037
15JB79_11	9.27644	0.456077	0.734	0.028
15JB79_12	5.12821	0.447074	0.762	0.034
15JB79_13	2.2173	0.152408	0.765	0.037
15JB79_14	7.35294	0.648789	0.773	0.03
15JB79_15	2.20751	0.0779693	0.8	0.032
15JB79_16	9.31966	0.590622	0.739	0.039
15JB79_17	5.02513	0.303023	0.745	0.041
15JB79_18	2.89855	0.151229	0.835	0.046
15JB79_19	2.91545	0.152998	0.834	0.036
15JB79_20	7.1736	0.329348	0.748	0.033
15JB79_21	3.98406	0.190473	0.795	0.038
15JB79_22	2.84091	0.112991	0.791	0.033
15JB79_23	2.62467	0.144667	0.789	0.041
15JB79_24	3.62319	0.249422	0.767	0.052
15JB79_25	5.55556	0.432099	0.767	0.039
15JB79_26	3.55872	0.177303	0.794	0.026
15JB79_27	3.42466	0.211109	0.802	0.044
15JB79_28	4.7619	0.408163	0.805	0.042
16JB63_1	3.67918	0.1489	0.778	0.031
16JB63_2	3.63636	0.171901	0.787	0.032
16JB63_3	4.32152	0.156875	0.774	0.023
16JB63_4	3.86997	0.164743	0.792	0.035
16JB63_5	3.24675	0.263535	0.756	0.028
16JB63_6	4.78469	0.210618	0.787	0.035
16JB63_7	3.84615	0.177515	0.739	0.034
16JB63_8	3.53357	0.22475	0.772	0.032
16JB63_9	4.82859	0.160875	0.785	0.03
16JB63_10	3.89105	0.227104	0.79	0.035
16JB63_11	4.82625	0.174696	0.801	0.035
16JB63_12	4.4964	0.177915	0.757	0.033
16JB63_13	3.87597	0.195301	0.756	0.034
16JB63_14	3.01205	0.117942	0.792	0.03
16JB63_15	1.81159	0.0820468	0.812	0.028
16JB63_16	4.51875	0.183772	0.745	0.035
16JB63_17	4.29	0.152754	0.779	0.032
16JB63_18	3.23625	0.136153	0.775	0.037
16JB63_19	3.38983	0.149382	0.8	0.035
16JB63_20	4.05022	0.180447	0.833	0.04
16JB63_21	4.93827	0.214601	0.771	0.035
16JB63_22	4.03226	0.243887	0.798	0.029
16JB63_23	3.73134	0.23669	0.763	0.029
16JB63_24	4.61468	0.183139	0.788	0.033
16JB63_25	3.24675	0.179204	0.786	0.041
16JB63_26	4.19992	0.176393	0.79	0.034
16JB63_27	3.3557	0.157651	0.784	0.037
16JB63_28	1.81818	0.0760331	0.811	0.019
16JB63_29	3.38181	0.137239	0.783	0.029
18JB32_1	15.625	0.537109	0.57	0.016
18JB32_2	9.3633	0.376987	0.675	0.019
18JB32_3	8.32639	0.381309	0.668	0.015
18JB32_4	13.5135	0.566107	0.595	0.018
18JB32_5	9.25069	0.350859	0.649	0.018
18JB32_6	4.31034	0.241528	0.764	0.023
18JB32_7	9.33707	0.435904	0.685	0.023
18JB32_8	5.57414	0.201961	0.721	0.02
18JB32_9	7.07714	0.275473	0.718	0.027
18JB32_10	8.43882	0.327583	0.665	0.021
18JB32_11	4.3592	0.190026	0.764	0.021
18JB32_12	9.47867	0.359381	0.638	0.019
18JB32_13	11.8064	0.529684	0.632	0.016
18JB32_14	5.02513	0.303023	0.723	0.026
18JB32_15	16.8634	0.568749	0.529	0.013
18JB32_16	9.7561	0.342653	0.659	0.02
18JB32_17	5.17331	0.171284	0.708	0.023
18JB32_18	3.83142	0.135054	0.749	0.023
18JB32_19	8.13008	0.284222	0.678	0.019
18JB32_20	4.1806	0.152054	0.749	0.016
18JB32_21	11.4155	0.390943	0.633	0.013
18JB32_22	11.6686	0.422085	0.644	0.019
18JB32_23	13.2802	0.546728	0.612	0.018
18JB32_24	14.1643	0.481506	0.571	0.018
18JB32_25	3.06749	0.112913	0.775	0.019
18JB32_26	7.68049	0.265455	0.685	0.022
18JB32_27	12.987	0.40479	0.584	0.012
18JB32_28	10.3413	0.342213	0.648	0.016
18JB32_29	10.6496	0.691829	0.642	0.02
18JB32_30	8.70322	0.325708	0.664	0.018
18JB32_31	14.4718	0.460751	0.553	0.017
18JB32_32	9.12409	0.316346	0.667	0.017
18JB32_33	4.28082	0.130111	0.737	0.022
18JB32_34	11.2233	0.302312	0.631	0.016
18JB32_35	5.78704	0.19759	0.745	0.017
18JB32_36	9.63391	0.278437	0.657	0.021
18JB32_37	12.0337	0.419948	0.62	0.018
18JB32_38	12.21	0.357803	0.598	0.017
18JB32_39	10.5932	0.561082	0.663	0.015
18JB32_1	8.55432	0.439058	0.701	0.021
18JB32_2	4.57456	0.230193	0.761	0.016
18JB32_3	9.25926	0.788752	0.665	0.017
18JB32_4	3.4638	0.191967	0.773	0.015
18JB32_5	13.2626	0.668407	0.605	0.018
18JB32_6	12.4378	0.603327	0.602	0.014
18JB32_7	9.53289	0.499818	0.661	0.021
18JB32_8	10.2775	0.580948	0.666	0.018
18JB32_9	8.23723	0.447823	0.684	0.016
18JB32_10	9.02527	0.464296	0.68	0.02
18JB32_11	2.78552	0.162941	0.792	0.018
18JB32_12	4.90437	0.264581	0.74	0.02
18JB32_13	5.64653	0.296514	0.737	0.018
18JB32_14	2.99222	0.152207	0.755	0.023
18JB32_15	8.18331	0.441979	0.661	0.022
18JB32_16	10.2459	0.577382	0.664	0.023
18JB32_17	6.15763	0.356415	0.729	0.02
18JB32_18	11.4942	0.620954	0.61	0.013
18JB32_19	9.01713	0.46346	0.653	0.012
18JB32_20	15.8983	0.808814	0.557	0.017
18JB32_21	8.06452	1.69095	0.657	0.022
18JB32_22	10.5042	0.617894	0.62	0.018
18JB32_23	14.9701	0.739539	0.569	0.013
18JB32_24	10.582	0.537499	0.657	0.013
18JB32_25	4.10004	0.218534	0.77	0.019
18JB32_26	14.4718	0.733013	0.586	0.015
18JB32_27	10.2041	0.510204	0.669	0.018
18JB32_28	8.8968	0.546156	0.651	0.018
18JB32_29	4.37828	0.249202	0.737	0.025
18JB32_30	11.3766	0.569475	0.64	0.018
18JB32_31	3.80228	0.578294	0.761	0.016
18JB32_32	11.9048	0.595238	0.626	0.013
18JB32_33	2.93772	0.155344	0.765	0.023
18JB32_34	9.74659	0.46548	0.639	0.013
18JB32_35	8.12348	0.422342	0.661	0.019
18JB32_36	12.3457	0.640146	0.633	0.018
18JB32_37	5.05561	0.255592	0.744	0.012
18JB32_38	7.55858	0.382785	0.695	0.017
18JB32_39	1.96078	0.538254	0.768	0.022
18JB32_40	5.65291	0.309967	0.726	0.023
16JB62_1	9.94036	0.612626	0.676	0.033
16JB62_2	15.1976	0.692898	0.651	0.048
16JB62_3	9.00901	1.21743	0.694	0.031
16JB62_4	11.3766	0.698902	0.662	0.034
16JB62_5	11.2108	0.552997	0.684	0.029
16JB62_6	21.322	1.4548	0.522	0.057
16JB62_7	15.5763	0.630817	0.628	0.028
16JB62_8	10	0.53	0.692	0.032
16JB62_9	12.0773	0.743891	0.661	0.035
16JB62_10	11.9048	0.566893	0.7	0.027
16JB62_11	8.61326	0.667695	0.729	0.032
16JB62_12	12.7226	0.631276	0.658	0.037
16JB62_13	7.87402	0.359601	0.738	0.03
16JB62_14	14.7059	0.821799	0.676	0.035
16JB62_15	11.9474	0.628061	0.71	0.032
16JB62_16	13.1926	0.661371	0.675	0.036
16JB62_17	11.1857	0.613085	0.676	0.027
16JB62_18	11.4811	0.593166	0.709	0.029
16JB62_19	8.34028	0.612131	0.735	0.034
16JB62_20	12.6582	0.897292	0.655	0.034
16JB62_21	12.2399	0.764057	0.671	0.03
16JB62_22	12.9366	0.535539	0.639	0.032
16JB62_23	10.5597	0.602135	0.671	0.028
16JB62_24	7.92393	0.376732	0.737	0.038
16JB62_25	8.05153	0.576962	0.73	0.039
16JB62_26	8.49618	0.72185	0.701	0.033
16JB62_27	8.07754	0.437153	0.751	0.039
18JB08_1	23.8664	1.13921	0.435	0.027
18JB08_2	19.305	0.819904	0.48	0.02
18JB08_3	17.5747	0.741288	0.566	0.025
18JB08_4	19.9203	0.952366	0.499	0.024
18JB08_5	13.3156	0.567375	0.609	0.033
18JB08_6	14.43	0.770434	0.593	0.03
18JB08_7	25.1889	1.33241	0.443	0.022
18JB08_8	14.9254	0.779684	0.579	0.03
18JB08_9	12.5	0.59375	0.657	0.026
18JB08_10	31.25	1.26953	0.332	0.015
18JB08_11	20.4499	0.836397	0.503	0.025
18JB08_12	13.7363	0.717003	0.589	0.028
18JB08_13	21.2314	1.03678	0.451	0.018
18JB08_14	7.39098	0.540804	0.72	0.03
18JB08_15	29.1545	1.35998	0.375	0.018
18JB08_16	21.7391	0.94518	0.459	0.017
18JB08_17	13.7552	0.756818	0.589	0.023
18JB08_18	23.4192	1.3163	0.421	0.019
18JB08_19	9.18274	0.421613	0.71	0.034
18JB08_20	33.3778	1.3369	0.283	0.014
18JB08_21	31.5457	1.39319	0.328	0.019
18JB08_22	31.0559	1.4467	0.314	0.015
18JB08_23	14.9254	0.6683	0.603	0.027
18JB08_24	23.31	0.978043	0.466	0.018
18JB08_25	19.4175	0.754077	0.511	0.023
18JB08_26	12.9366	0.585746	0.615	0.026
18JB08_27	16.2866	0.663137	0.59	0.027
18JB08_28	23.4192	0.987226	0.438	0.018
18JB67_1	13.6986	0.600488	0.604	0.026
18JB67_2	7.0028	0.313851	0.749	0.03
18JB67_3	12.8866	1.06281	0.641	0.024
18JB67_4	9.17431	0.521842	0.699	0.025
18JB67_5	6.69792	0.435163	0.726	0.034
18JB67_6	15.528	0.819799	0.584	0.017
18JB67_7	12.1212	0.631772	0.635	0.028
18JB67_8	7.84314	0.553633	0.694	0.031
18JB67_9	5.87199	0.337907	0.716	0.03
18JB67_10	9.34579	1.3975	0.664	0.04
18JB67_11	7.37463	0.386135	0.722	0.03
18JB67_12	9.30233	0.501893	0.697	0.026
18JB67_13	11.4679	0.604958	0.659	0.023
18JB67_14	7.54148	0.352618	0.716	0.035
18JB67_15	6.92521	0.431627	0.725	0.03
18JB67_16	6.87285	0.439296	0.724	0.035
18JB67_17	8.26446	0.751315	0.672	0.026
18JB67_18	4.21941	0.231444	0.738	0.029
18JB67_19	4.36681	0.476726	0.782	0.03
18JB67_20	5.87199	0.272394	0.751	0.032
18JB67_21	9.3985	0.512324	0.679	0.025
18JB67_22	7.40193	0.388998	0.714	0.038
18JB67_23	7.14286	0.367347	0.735	0.032
18JB67_24	12.4224	0.478377	0.663	0.024
18JB67_25	8.62813	0.402001	0.7	0.03
18JB67_26	5.98802	0.290437	0.748	0.031
18JB67_27	9.03342	0.424334	0.688	0.026
18JB67_28	15.6006	0.754476	0.594	0.021
18JB67_29	3.80228	0.187945	0.765	0.034
15JB77_1	11.5607	0.601423	0.665	0.017
15JB77_2	16.6113	0.965773	0.606	0.017
15JB77_3	9.21659	0.458706	0.668	0.018
15JB77_4	14.43	0.770434	0.623	0.017
15JB77_5	10.1937	0.529947	0.688	0.023
15JB77_6	10.2987	0.519706	0.671	0.02
15JB77_7	12.837	0.80746	0.636	0.021
18JB02_1	1.12994	0.0587315	0.803	0.023
18JB02_2	4.80769	0.254253	0.747	0.022
18JB02_3	3.32116	0.165451	0.802	0.022
18JB02_4	2.34962	0.115935	0.797	0.02
18JB02_5	2.35294	0.132872	0.803	0.023
18JB02_6	3.6483	0.173032	0.798	0.019
18JB02_7	2.87604	0.140618	0.776	0.026
18JB02_8	3.59325	0.167848	0.767	0.018
18JB02_9	2.84172	0.145356	0.796	0.022
18JB02_10	3.12305	0.165808	0.773	0.022
18JB02_11	0.947867	0.0512118	0.8	0.022
18JB02_12	2.38436	0.113703	0.799	0.018
18JB02_13	2.33973	0.114961	0.811	0.018
18JB02_14	2.39406	0.120362	0.776	0.02
18JB02_15	3.37041	0.170395	0.794	0.025
18JB02_16	1.64745	0.0841365	0.821	0.027
18JB02_17	5.4615	0.259503	0.745	0.018
18JB02_18	1.87617	0.102081	0.811	0.026
18JB02_19	2.14133	0.110047	0.788	0.024
18JB02_20	4.22297	0.196168	0.753	0.016
18JB02_21	3.04971	0.158112	0.769	0.023
18JB02_22	3.87447	0.19515	0.776	0.02
18JB02_23	2.89268	0.150617	0.766	0.021
18JB02_24	3.61664	0.183121	0.767	0.022
18JB02_25	3.50385	0.184155	0.76	0.021
18JB02_26	2.46305	0.127399	0.763	0.02
18JB02_27	1.90476	0.105215	0.788	0.024
18JB02_28	3.52113	0.185975	0.752	0.023
18JB02_29	2.71739	0.1403	0.815	0.022
18JB02_30	0.896861	0.0530877	0.811	0.025
18JB02_31	3.15259	0.149082	0.766	0.021
18JB02_32	0.914077	0.0492966	0.837	0.024
18JB02_33	2.73973	0.217677	0.8	0.018
18JB02_34	2.68097	0.143752	0.791	0.026
18JB02_35	1.5456	0.0764437	0.803	0.023
18JB02_36	1.5949	0.0788545	0.818	0.021
18JB02_37	2.63505	0.131926	0.799	0.025
18JB02_38	2.54972	0.130021	0.811	0.022
18JB02_39	3.7679	0.198759	0.805	0.021
18JB02_1	1.63399	0.0827673	0.791	0.017
18JB02_2	1.75439	0.0861804	0.807	0.023
18JB02_3	1.44509	0.0772662	0.818	0.024
18JB02_5	2.57732	0.132852	0.789	0.023
18JB02_6	2.81294	0.142427	0.802	0.02
18JB02_7	2.40906	0.121875	0.795	0.015
18JB02_8	2.48139	0.129303	0.806	0.025
18JB02_9	1.11982	0.0601919	0.81	0.023
18JB02_10	2.32019	0.118432	0.805	0.023
18JB02_11	2.51699	0.126705	0.801	0.023
18JB02_12	3.94322	0.202137	0.77	0.021
18JB02_13	3.12989	0.166536	0.773	0.021
18JB02_14	2.45098	0.126153	0.803	0.027
18JB02_15	2.77393	0.138504	0.791	0.022
18JB02_16	3.31126	0.175431	0.785	0.023
18JB02_17	3.66435	0.187984	0.773	0.023
18JB02_18	2.15983	0.107292	0.809	0.023
18JB02_20	2.04082	0.0999584	0.801	0.02
18JB02_21	1.10132	0.0582196	0.829	0.024
18JB02_22	1.05042	0.0562725	0.798	0.024
18JB02_23	2.7027	0.146092	0.783	0.02
18JB02_24	2.50627	0.131909	0.788	0.023
18JB02_25	2.11954	0.103327	0.798	0.022
18JB02_27	1.15741	0.06564	0.802	0.02
18JB02_28	2.80269	0.141391	0.801	0.025
18JB02_29	2.2779	0.129721	0.79	0.02
18JB02_30	1.08225	0.0562208	0.804	0.023
18JB06_1	11.1359	0.582834	0.682	0.026
18JB06_2	15.528	1.06092	0.62	0.027
18JB06_3	15.748	0.793602	0.592	0.023
18JB06_4	9.22509	0.468063	0.699	0.025
18JB06_5	10.1626	0.537048	0.695	0.025
18JB06_6	9.17431	0.462924	0.685	0.023
18JB06_7	28.1928	1.4307	0.446	0.016
18JB06_8	15.8228	1.12662	0.581	0.022
18JB06_9	9.65251	0.484489	0.712	0.026
18JB06_10	11.6144	0.809366	0.662	0.025
18JB06_11	13.6054	0.758943	0.624	0.026
18JB06_12	14.7929	0.831553	0.622	0.018
18JB06_13	13.4409	0.740693	0.627	0.02
18JB06_14	12.4688	0.777358	0.635	0.023
18JB06_15	11.2867	0.611468	0.665	0.022
18JB06_16	13.986	0.801995	0.655	0.022
18JB06_17	11.4416	0.680739	0.646	0.022
18JB06_18	14.0056	0.941553	0.618	0.03
18JB06_19	12.21	1.0585	0.673	0.019
18JB06_20	9.35454	0.743813	0.705	0.028
18JB06_21	6.38162	0.309511	0.74	0.026
18JB06_22	27.3898	1.42538	0.437	0.014
18JB06_23	12.4378	0.649736	0.659	0.017
18JB06_24	9.99001	0.508981	0.677	0.025
18JB06_25	19.3424	1.08497	0.588	0.018
18JB06_26	9.38086	0.536804	0.702	0.022
18JB06_27	14.6413	0.771722	0.624	0.018
18JB06_28	7.69823	0.39706	0.705	0.022
18JB06_29	10.989	0.57964	0.672	0.018
18JB06_1	21.8818	0.718222	0.539	0.017
18JB06_2	8.48176	0.41006	0.715	0.024
18JB06_3	10.8578	0.365462	0.673	0.021
18JB06_4	4.92854	0.162746	0.756	0.029
18JB06_5	20.4918	1.17576	0.511	0.027
18JB06_6	9.8912	0.303291	0.682	0.014
18JB06_7	10.8108	0.315559	0.685	0.021
18JB06_8	11.1732	0.486876	0.683	0.023
18JB06_9	24.6914	0.792562	0.487	0.014
18JB06_10	7.88643	0.44781	0.737	0.023
18JB06_11	12.1654	0.429195	0.667	0.015
18JB06_12	12.2549	0.405493	0.664	0.019
18JB06_13	13.947	0.544653	0.642	0.025
18JB06_14	22.6757	0.668446	0.478	0.014
18JB06_15	9.19118	0.346359	0.702	0.022
18JB06_16	27.248	1.41066	0.423	0.02
18JB06_17	17.0068	0.549539	0.576	0.016
18JB06_18	4.20698	0.176987	0.792	0.029
18JB06_19	11.0132	0.436647	0.666	0.018
18JB06_20	18.5185	0.720165	0.564	0.017
18JB06_21	16.1031	0.544548	0.607	0.021
18JB06_22	7.26216	0.295339	0.702	0.021
18JB06_23	11.9474	0.399675	0.652	0.023
18JB06_24	10.4603	0.328251	0.659	0.02
18JB06_25	8.39631	0.500535	0.71	0.024
18JB06_26	9.3633	0.508494	0.701	0.027
18JB06_27	8.15661	0.239509	0.705	0.022
18JB06_28	8.07103	0.293137	0.697	0.018
18JB15_1	12.9199	0.734464	0.634	0.028
18JB15_2	11.5741	0.683192	0.664	0.023
18JB15_3	21.7391	1.27599	0.51	0.022
18JB15_4	8.63558	0.514555	0.696	0.022
18JB15_5	14.9925	0.786713	0.625	0.026
18JB15_6	11.3507	0.592661	0.686	0.03
18JB15_7	13.0378	0.968912	0.605	0.026
18JB15_8	26.2467	1.37778	0.455	0.017
18JB15_9	30.581	1.77688	0.369	0.014
18JB15_10	8.48896	0.482819	0.694	0.029
18JB15_11	28.9687	1.51053	0.397	0.018
18JB15_12	8.12348	0.468535	0.699	0.031
18JB15_13	21.3675	1.09577	0.511	0.017
18JB15_14	19.4932	1.13995	0.54	0.02
18JB15_15	6.73854	0.404131	0.719	0.026
18JB15_16	9.12409	0.482844	0.668	0.026
18JB15_17	15.1976	0.762188	0.584	0.025
18JB15_18	10.01	0.531062	0.657	0.026
18JB15_19	5.71429	0.303673	0.746	0.025
18JB15_20	17.2712	0.865049	0.559	0.021
18JB15_21	15.5763	0.873439	0.621	0.021
18JB15_22	22.6757	1.18264	0.492	0.023
18JB15_23	24.2131	1.34843	0.487	0.018
18JB15_24	19.1205	1.24301	0.544	0.022
18JB15_25	23.5849	1.39062	0.514	0.015
18JB15_26	25.5755	2.09313	0.427	0.026
18JB15_27	21.8818	1.24492	0.531	0.027
18JB15_28	8.74891	0.474569	0.681	0.024
18JB15_29	8.01282	0.539324	0.709	0.031
18JB15_30	9.0009	0.583317	0.685	0.034
18JB28_1	2.457	0.138848	0.812	0.033
18JB28_3	2.68097	0.150939	0.793	0.032
18JB28_4	2.2831	0.135527	0.791	0.028
18JB28_5	3.30033	0.228736	0.803	0.037
18JB28_6	4.86855	0.284433	0.797	0.039
18JB28_7	3.2113	0.165	0.818	0.028
18JB28_9	3.71747	0.248753	0.771	0.028
18JB28_11	4.31406	0.223334	0.79	0.027
18JB28_12	4.08664	0.233808	0.794	0.032
18JB28_14	0.204082	0.199917	1.43	0.29
18JB28_15	3.74813	0.210727	0.788	0.028
18JB28_16	3.56633	0.190781	0.798	0.03
18JB28_17	4.24448	0.234203	0.797	0.025
18JB28_18	2.46914	0.128029	0.843	0.037
18JB28_19	2.73224	0.149303	0.809	0.025
18JB28_20	2.58398	0.15357	0.832	0.03
18JB28_21	2.71003	0.176262	0.826	0.03
18JB28_22	3.56633	0.178062	0.786	0.019
18JB28_23	3.52113	0.247967	0.798	0.027
18JB28_25	4.649	0.237745	0.792	0.026
18JB28_26	2.80269	0.141391	0.773	0.023
18JB28_10	2.39234	0.125913	0.814	0.024
18JB28_13	1.7762	0.104111	0.854	0.029
18JB28_24	15.1286	0.89261	0.613	0.026
18JB28_8	29.4985	1.65331	0.399	0.022
18JB31_1	25.1636	0.886487	0.412	0.013
18JB31_2	13.8696	0.615573	0.611	0.028
18JB31_3	18.622	1.00566	0.486	0.015
18JB31_4	20.3666	0.871077	0.528	0.023
18JB31_5	22.8311	0.990388	0.447	0.016
18JB31_6	23.753	1.57977	0.42	0.025
18JB31_7	32.1543	2.0678	0.303	0.026
18JB31_8	24.3309	1.00639	0.45	0.017
18JB31_9	28.2486	1.11718	0.361	0.01
18JB31_10	26.9905	1.01989	0.383	0.011
18JB31_11	26.9978	0.87466	0.377	0.0093
18JB31_12	18.2482	0.79919	0.514	0.018
18JB31_13	27.2926	1.11733	0.38	0.011
18JB31_14	28.5063	1.05639	0.355	0.011
18JB31_15	30.7503	1.1347	0.332	0.013
18JB31_16	19.6078	0.922722	0.492	0.012
18JB31_17	22.6757	1.28547	0.457	0.015
18JB31_18	16.3399	0.961169	0.563	0.019
18JB31_19	26.7165	0.927905	0.376	0.011
18JB31_20	28.9352	1.00469	0.347	0.011
18JB31_21	28.9268	1.00411	0.3395	0.0094
18JB31_22	20.1207	0.769203	0.502	0.015
18JB31_23	23.8606	0.853996	0.4423	0.0094
18JB31_24	28.1294	1.10777	0.385	0.014
18JB31_25	26.7237	0.928401	0.401	0.012
18JB31_26	19.3798	1.05162	0.5	0.014
18JB31_27	20.1207	1.25501	0.482	0.02
18JB31_28	27.933	1.32643	0.38	0.013
18JB31_29	18.6916	0.838501	0.55	0.02
18JB36_1	21.7391	1.8431	0.43	0.03
18JB36_2	21.7865	0.854372	0.436	0.016
18JB36_3	16.1031	1.19282	0.53	0.024
18JB36_4	29.5858	1.40051	0.315	0.021
18JB36_5	11.1111	0.469136	0.635	0.025
18JB36_6	7.7821	0.393647	0.667	0.025
18JB36_7	22.3714	0.850812	0.434	0.014
18JB36_8	24.57	0.965898	0.376	0.016
18JB36_9	19.3798	3.00463	0.428	0.023
18JB36_10	28.9436	1.08905	0.316	0.013
18JB36_11	19.3424	0.785667	0.458	0.017
18JB36_12	28.0899	1.18356	0.339	0.013
15JB76_1	12.9702	0.555143	0.63	0.02
15JB76_2	8.60585	0.370303	0.693	0.02
15JB76_3	10.0604	0.55666	0.698	0.022
15JB76_4	6.4433	0.2574	0.734	0.018
15JB76_5	6.42261	0.362999	0.749	0.023
15JB76_6	3.49406	0.146502	0.783	0.028
15JB76_7	1.05263	0.0742382	0.812	0.027
15JB76_8	0.801925	0.0340834	0.797	0.025
15JB76_9	0.98912	0.0420694	0.814	0.024
15JB76_10	1.31062	0.0858857	0.839	0.025
15JB76_11	14.6199	0.577101	0.638	0.017
15JB76_12	4.19639	0.140878	0.748	0.02
15JB76_13	1.06496	0.078256	0.814	0.035
18JB30_1	11.4025	0.403053	0.639	0.023
18JB30_2	17.331	1.47178	0.502	0.027
18JB30_3	7.28863	0.276245	0.734	0.028
18JB30_4	3.63636	0.238016	0.76	0.022
18JB30_5	4.98008	0.181049	0.756	0.03
18JB30_6	2.18341	0.0858107	0.783	0.026
18JB30_7	2.68097	0.115001	0.796	0.03
18JB30_8	4.22119	0.158584	0.763	0.029
18JB30_9	15.9236	0.88746	0.563	0.022
18JB30_10	14.0252	0.53111	0.587	0.021
18JB30_11	20.202	0.693807	0.485	0.012
18JB30_12	15.528	1.30203	0.55	0.024
18JB30_13	20.4499	0.669117	0.467	0.012
18JB30_14	13.4409	0.957481	0.573	0.019
18JB30_15	9.09091	0.479339	0.654	0.027
18JB30_16	7.98722	0.395533	0.711	0.022
18JB30_17	2.82486	0.127677	0.781	0.025
18JB30_18	1.00301	0.0442652	0.83	0.025
18JB30_19	6.51042	0.283983	0.719	0.03
18JB30_20	17.8571	0.829082	0.515	0.018
18JB30_21	4.44642	0.217477	0.731	0.027
18JB30_22	3.37838	0.159788	0.77	0.033
18JB30_23	17.9212	0.674452	0.549	0.017
18JB30_25	21.9346	0.673579	0.438	0.01
18JB30_26	5.1975	0.224217	0.744	0.03
18JB30_27	12.987	0.472255	0.604	0.02
18JB30_28	14.5985	1.06559	0.574	0.026
18JB50_1	1.5748	0.17608	0.819	0.03
18JB50_2	0.746826	0.0529862	0.798	0.023
18JB50_3	15.6006	0.584111	0.54	0.021
18JB50_4	12.8866	0.581225	0.596	0.024
18JB50_5	10.1937	0.852071	0.623	0.027
18JB50_6	13.3869	0.645151	0.599	0.029
18JB50_7	14.2045	0.544777	0.53	0.02
18JB50_8	20.3252	0.991473	0.446	0.016
18JB50_9	10.0503	0.363627	0.625	0.022
18JB50_10	8.67303	0.473895	0.692	0.02
18JB50_11	30.1205	1.72376	0.324	0.018
18JB50_12	22.4719	1.16147	0.411	0.017
18JB50_13	13.0378	0.492955	0.616	0.023
18JB50_14	1.8315	0.140885	0.762	0.03
18JB50_15	10.4822	0.681232	0.601	0.025
18JB50_16	6.57462	0.293934	0.698	0.027
18JB50_17	4.11523	0.203221	0.734	0.029
18JB50_18	14.3885	0.558977	0.56	0.017
18JB50_19	10.3199	0.852006	0.622	0.019
18JB50_20	16.7785	0.619341	0.544	0.015
18JB50_21	16.6945	0.641024	0.543	0.021
18JB50_22	14.9477	0.647956	0.584	0.02
18JB50_23	13.9082	0.638346	0.588	0.021
18JB50_24	6.57462	0.293934	0.724	0.019
18JB50_25	6.94444	0.289352	0.717	0.025
18JB18_1	6.60066	0.2222	0.723	0.025
18JB18_2	11.9617	0.457865	0.669	0.023
18JB18_3	3.68188	0.109806	0.762	0.026
18JB18_4	13.21	0.628219	0.634	0.017
18JB18_5	10.101	0.316294	0.687	0.024
18JB18_6	8.56898	0.29371	0.693	0.018
18JB18_7	8.08407	0.274479	0.681	0.016
18JB18_8	6.90131	0.228615	0.701	0.021
18JB18_9	6.33714	0.23694	0.72	0.021
18JB18_10	8.21018	0.269628	0.698	0.02
18JB18_11	4.26985	0.134914	0.785	0.017
18JB18_12	8.14332	0.324937	0.705	0.024
18JB18_13	9.4697	0.340766	0.67	0.018
18JB18_14	11.919	0.355154	0.627	0.019
18JB18_15	8.74891	0.260247	0.68	0.018
18JB18_16	3.23625	0.157099	0.789	0.025
18JB18_17	7.44602	0.288304	0.7	0.025
18JB18_18	6.01323	0.206106	0.753	0.023
18JB18_19	8.8574	0.298123	0.7	0.017
18JB18_20	5.00751	0.157974	0.759	0.026
18JB18_21	7.01262	0.221296	0.693	0.018
18JB18_22	5.97372	0.21768	0.742	0.02
18JB18_23	5.86167	0.195847	0.75	0.021
18JB18_24	5.51572	0.301189	0.742	0.022
18JB18_25	10.7296	0.310836	0.67	0.018
18JB18_26	12.0627	0.451079	0.622	0.018
18JB18_27	10.1112	0.3885	0.67	0.018
18JB18_28	13.986	0.723752	0.629	0.018
18JB18_1	10.2881	0.518637	0.656	0.019
18JB18_2	7.93021	0.415063	0.707	0.023
18JB18_3	10.5263	0.598338	0.632	0.025
18JB18_4	8.96861	0.466529	0.688	0.015
18JB18_5	10.9649	0.553055	0.653	0.017
18JB18_6	11.2486	0.620001	0.622	0.024
18JB18_7	9.92064	0.492095	0.673	0.012
18JB18_8	11.5875	0.57736	0.621	0.016
18JB18_9	12.9366	0.669424	0.638	0.022
18JB18_10	10.3093	0.542034	0.671	0.016
18JB18_11	10.6952	0.537619	0.644	0.014
18JB18_12	8.5034	0.46277	0.689	0.025
18JB18_13	7.94913	0.404407	0.713	0.02
18JB18_14	10.7296	0.564111	0.656	0.016
18JB18_15	9.14913	0.468757	0.678	0.021
18JB18_16	8.75657	0.452397	0.693	0.019
18JB18_17	6.13497	0.312394	0.742	0.021
18JB18_18	9.24214	0.461253	0.689	0.021
18JB18_19	4.28082	0.219905	0.759	0.02
18JB18_20	8.24402	0.41458	0.685	0.019
18JB18_21	8.81057	0.47352	0.679	0.02
18JB18_22	4.03226	0.260146	0.763	0.027
18JB18_23	6.77966	0.344728	0.722	0.023
18JB18_24	9.95025	0.514839	0.669	0.015
18JB18_25	5.44366	0.281517	0.729	0.017
18JB18_26	9.25926	0.497256	0.664	0.017
18JB18_27	7.63942	0.373509	0.715	0.021
18JB18_28	7.19942	0.357639	0.726	0.024
18JB18_29	7.06215	0.369067	0.708	0.022
18JB20_1	2.35849	0.0778747	0.793	0.026
18JB20_2	3.57143	0.497449	0.788	0.03
18JB20_3	8.86525	0.267215	0.67	0.021
18JB20_4	6.26959	0.369493	0.731	0.021
18JB20_5	5.07614	0.541112	0.735	0.024
18JB20_6	4.7619	0.430839	0.741	0.025
18JB20_7	0.747384	0.0340736	0.831	0.022
18JB20_8	1.43678	0.0681233	0.801	0.028
18JB20_9	3.1348	0.117923	0.788	0.03
18JB20_10	1.13636	0.206612	0.766	0.039
18JB20_11	3.59712	0.245846	0.777	0.024
18JB20_12	1.75131	0.101214	0.788	0.028
18JB20_13	3.90625	0.259399	0.747	0.023
18JB20_14	3.44828	0.214031	0.757	0.021
18JB20_15	1.73913	0.0816635	0.772	0.032
18JB20_16	4.54545	0.227273	0.768	0.022
18JB20_17	2.33645	0.524063	0.781	0.027
18JB20_18	2.1978	0.101437	0.765	0.029
18JB20_19	6.32911	0.640923	0.687	0.038
18JB20_20	3.51989	0.136286	0.786	0.026
18JB20_21	3.34001	0.133868	0.798	0.024
18JB20_22	5.37634	0.317956	0.719	0.022
18JB20_23	4.45236	0.198235	0.771	0.025
18JB20_24	1.96464	0.104215	0.769	0.025
18JB20_25	2.65252	0.182932	0.795	0.03
18JB20_26	0.537634	0.0317956	0.825	0.023
18JB20_27	3.13578	0.108164	0.762	0.022
18JB20_28	5.81395	0.371823	0.72	0.022
18JB20_29	5.26316	0.304709	0.743	0.021
18JB20_1	1.31579	0.190443	0.78	0.029
18JB20_2	1.98413	0.149597	0.779	0.028
18JB20_3	6.32911	0.560808	0.724	0.026
18JB20_4	2.98508	0.249499	0.772	0.024
18JB20_5	1.05374	0.0632911	0.818	0.025
18JB20_6	4.28082	0.219905	0.754	0.024
18JB20_7	1.87266	0.259507	0.799	0.037
18JB20_8	3.83142	0.278915	0.76	0.026
18JB20_9	0.917431	0.126252	0.822	0.019
18JB20_10	2.15517	0.157922	0.771	0.027
18JB20_11	1.93424	0.101014	0.804	0.024
18JB20_12	8.23723	0.590312	0.69	0.028
18JB20_13	1.49477	0.080436	0.819	0.029
18JB20_14	0.91659	0.0554491	0.808	0.029
18JB20_15	1.16144	0.0687961	0.802	0.023
18JB20_16	2.36967	0.129153	0.808	0.033
18JB20_17	3.71747	0.262572	0.75	0.025
18JB20_18	1.43472	0.121447	0.791	0.036
18JB20_19	3.0581	0.2338	0.789	0.027
18JB20_20	1.62338	0.134403	0.783	0.023
18JB20_21	0.768049	0.0401132	0.815	0.028
18JB20_22	4.42674	0.235152	0.773	0.024
18JB20_23	4.56621	0.333604	0.778	0.027
18JB20_24	1.46628	0.0752488	0.806	0.023
18JB20_25	2.46305	0.145599	0.787	0.026
18JB20_26	3.367	0.204061	0.768	0.022
18JB20_27	0.900901	0.178557	0.812	0.042
18JB20_28	4.83092	0.396742	0.724	0.026
18JB20_29	1.5361	0.0802263	0.809	0.024
18JB20_30	16.5837	2.6402	0.486	0.047
18JB20_31	4.15455	0.224384	0.756	0.02
18JB20_32	6.06061	0.477502	0.717	0.023
18JB20_33	3.08357	0.161642	0.768	0.021
18JB20_34	6.32911	1.24179	0.714	0.025
18JB20_35	1.79856	0.0970447	0.826	0.037
18JB20_36	2.99401	0.170318	0.77	0.02
18JB20_37	3.04878	0.232377	0.787	0.027
18JB20_38	6.06061	0.359963	0.691	0.017
18JB20_39	3.41297	0.489231	0.764	0.016
18JB27_1	3.45782	0.114782	0.79	0.024
18JB27_2	9.59693	0.340774	0.718	0.026
18JB27_3	6.76133	0.219435	0.74	0.024
18JB27_4	4.2123	0.16324	0.777	0.02
18JB27_5	3.02115	0.118655	0.793	0.024
18JB27_6	3.22581	0.12487	0.793	0.027
18JB27_7	4.69263	0.173964	0.754	0.024
18JB27_8	1.51515	0.10101	0.81	0.032
18JB27_9	1.79856	0.0646964	0.797	0.023
18JB27_10	1.63399	0.0800974	0.776	0.028
18JB27_11	2.85714	0.155102	0.796	0.023
18JB27_12	6.44745	0.241104	0.76	0.028
18JB27_13	3.24044	0.115505	0.771	0.027
18JB27_14	2.457	0.0965898	0.779	0.021
18JB27_15	2.15983	0.0886322	0.773	0.027
18JB27_16	13.3869	0.501784	0.616	0.02
18JB27_17	8.51064	0.376641	0.717	0.024
18JB27_18	14.9701	0.515436	0.586	0.014
18JB27_19	2.08333	0.0868056	0.799	0.027
18JB27_20	2.86533	0.114942	0.755	0.027
18JB27_21	20.7039	0.642979	0.49	0.012
18JB27_22	1.05153	0.0420168	0.813	0.034
18JB27_23	0.8285	0.0363799	0.796	0.031
18JB27_24	14.8588	0.463649	0.594	0.015
18JB27_25	2.42131	0.0820782	0.778	0.019
18JB27_26	3.84615	0.443787	0.764	0.026
18JB27_27	3.17662	0.100909	0.77	0.021
18JB27_28	15.5039	0.456703	0.611	0.023
18JB27_29	2.14592	0.0782847	0.801	0.028
18JB27_30	4.90437	0.187612	0.791	0.028
18JB27_1	8.07103	0.416905	0.692	0.027
18JB27_2	8.97666	0.491541	0.689	0.022
18JB27_3	8.25083	0.476533	0.706	0.026
18JB27_4	5.30504	0.281434	0.756	0.025
18JB27_5	2.97	0.158776	0.787	0.026
18JB27_6	2.48139	0.147775	0.804	0.028
18JB27_7	13.2802	1.39328	0.62	0.02
18JB27_8	12.6263	0.63769	0.617	0.013
18JB27_9	2.59067	0.140943	0.82	0.033
18JB27_10	3.38983	0.195346	0.805	0.027
18JB27_11	3.04878	0.185901	0.785	0.028
18JB27_12	13.5501	0.679343	0.614	0.02
18JB27_13	6.32911	0.560808	0.731	0.028
18JB27_14	2.457	0.144885	0.771	0.025
18JB27_15	3.125	0.166016	0.786	0.028
18JB27_16	2.0202	0.10203	0.818	0.028
18JB27_17	2.97619	0.177154	0.808	0.022
18JB27_18	5.50964	0.303561	0.766	0.023
18JB27_19	18.2149	0.962173	0.542	0.013
18JB27_20	4.04858	0.327821	0.746	0.021
18JB27_21	4.69043	0.264002	0.762	0.022
18JB27_22	2.18341	0.128716	0.813	0.024
18JB27_23	2.04918	0.117576	0.787	0.03
18JB27_24	1.62866	0.0928392	0.796	0.029
18JB27_25	7.72201	0.393554	0.687	0.022
18JB27_26	5.52486	0.335765	0.755	0.019
18JB27_27	3.96825	0.220459	0.77	0.029
18JB27_28	11.7786	0.707546	0.63	0.018
18JB27_29	4.07	0.215344	0.786	0.025
18JB27_30	1.36426	0.0707254	0.789	0.028
18JB27_31	2.48139	0.147775	0.802	0.034
18JB27_32	1.443	0.0770434	0.806	0.029
18JB27_33	8.53971	0.422974	0.703	0.02
18JB27_34	8.51064	0.630149	0.711	0.021
18JB27_35	2.09205	0.135677	0.795	0.024
18JB27_36	3.19489	0.173524	0.776	0.022
18JB27_37	8.25764	0.456864	0.679	0.02
18JB27_38	1.89753	0.122422	0.822	0.026
18JB27_39	2.51256	0.157824	0.791	0.022
18JB27_40	5.75705	0.397724	0.73	0.026
18JB27_41	1.41243	0.101743	0.796	0.029
18JB27_42	4.27533	0.219341	0.734	0.021
18JB27_43	7.61615	0.545253	0.717	0.026
18JB27_44	4.39754	0.23206	0.802	0.023
18JB27_45	7.65111	0.41563	0.719	0.026
18JB27_46	2.72851	0.134006	0.793	0.024
18JB27_47	2.57069	0.145386	0.791	0.029
18JB27_48	3.73134	0.278458	0.728	0.022
18JB27_49	7.46269	0.406549	0.71	0.024
18JB34_1	16.8634	0.540311	0.458	0.014
18JB34_2	18.018	0.681763	0.427	0.013
18JB34_3	24.4499	0.777135	0.36	0.016
18JB34_4	23.0415	0.743273	0.347	0.01
18JB34_5	17.8571	0.605867	0.444	0.012
18JB34_6	21.8818	0.718222	0.416	0.014
18JB34_7	20.1613	1.30073	0.45	0.02
18JB34_8	17.762	0.630977	0.47	0.021
18JB34_9	18.1159	0.590737	0.47	0.018
18JB34_10	17.5131	0.766775	0.489	0.017
18JB34_11	22.173	0.73746	0.383	0.014
18JB34_12	19.0114	0.614437	0.425	0.013
18JB34_13	18.7617	0.668805	0.42	0.014
18JB34_14	18.9394	0.609791	0.422	0.014
18JB34_15	20.4499	1.38005	0.458	0.021
18JB34_16	18.9036	0.750426	0.428	0.016
18JB34_17	21.5983	0.746377	0.403	0.012
18JB34_18	23.9234	0.858497	0.373	0.013
18JB34_19	21.0526	0.930748	0.411	0.017
18JB34_20	21.3675	0.730514	0.403	0.017
18JB34_21	24.7525	1.04157	0.372	0.013
18JB34_22	17.1821	0.619974	0.465	0.016
18JB34_23	20.6186	1.06281	0.374	0.021
18JB34_24	20.0803	0.766117	0.416	0.015
18JB34_25	22.4719	0.807979	0.404	0.016
18JB34_26	29.3255	1.11798	0.297	0.012
18JB34_2	18.6567	0.974605	0.417	0.013
18JB34_3	20.9644	1.05481	0.426	0.014
18JB34_4	19.2678	1.00237	0.443	0.016
18JB34_5	21.3675	1.32406	0.397	0.019
18JB34_6	21.3083	1.0443	0.384	0.013
18JB34_7	20.0401	1.08433	0.419	0.012
18JB34_8	17.2117	0.859104	0.471	0.014
18JB34_9	19.3798	1.01406	0.462	0.018
18JB34_10	18.797	1.09531	0.435	0.015
18JB34_11	19.2308	0.998521	0.477	0.016
18JB34_12	19.802	1.05872	0.404	0.015
18JB34_13	15.4321	0.785894	0.492	0.018
18JB34_14	20.8768	1.13319	0.412	0.014
18JB34_15	22.8311	1.19889	0.368	0.015
18JB34_16	21.7865	1.18663	0.4	0.015
18JB34_17	19.685	1.0075	0.41	0.012
18JB55_1	10.8933	0.617047	0.671	0.029
18JB55_2	13.0208	0.559489	0.667	0.031
18JB55_3	9.52381	0.997732	0.685	0.027
18JB55_4	20.9644	0.703207	0.539	0.016
18JB55_5	5.78035	1.0692	0.738	0.026
18JB55_6	5.95238	0.531463	0.703	0.029
18JB55_7	12.6263	0.573921	0.643	0.027
18JB55_8	10.352	0.428653	0.701	0.027
18JB55_9	16.3934	0.618113	0.584	0.03
18JB55_10	27.3973	1.20098	0.44	0.017
18JB55_11	16.8919	0.798941	0.595	0.026
18JB55_12	19.2308	0.628698	0.573	0.023
18JB55_13	23.8664	0.911364	0.495	0.02
18JB55_14	11.5075	0.450235	0.678	0.024
18JB55_15	21.1416	0.759848	0.534	0.021
18JB55_16	25.7069	0.99127	0.458	0.019
18JB55_17	9.09091	0.396694	0.678	0.03
18JB55_18	15.4321	0.523929	0.599	0.025
18JB55_19	13.624	0.798135	0.619	0.022
18JB55_20	16.6389	0.581394	0.592	0.027
18JB55_21	19.305	0.596294	0.545	0.025
18JB55_22	14.1844	0.70419	0.624	0.022
18JB55_23	18.2482	0.732591	0.551	0.021
18JB55_24	28.5714	1.30612	0.427	0.021
18JB55_25	11.7371	0.495933	0.659	0.018
18JB55_26	7.79423	0.285525	0.679	0.028
18JB55_27	9.31099	0.398795	0.694	0.027
18JB55_28	21.0084	0.794435	0.518	0.022
18JB55_29	13.5318	0.549329	0.648	0.026
18JB55_30	19.5695	0.842521	0.556	0.021
